# Supplementary material for: Nutrition Claims Frequency and Compliance in a Food Sample of the Spanish Market: The BADALI Study
Source: MDPI journal article supplement (doi:10.3390/nu12102943), 2020-09-25
Supplement: s1 [file s1]

## Supplementary Materials

**Table S1.** Description of food groups and subgroups

| Food groups             | Food subgroups                     | Foods included                                                                                                       |
|-------------------------|------------------------------------|----------------------------------------------------------------------------------------------------------------------|
| <b>Cereals</b>          | Biscuits                           | Filled, regular, with chocolate, polialcohols.                                                                       |
|                         | Bran, flour and germ               | Bran, germ and flours (refined and whole-grain)                                                                      |
|                         | Bread (also sliced)                | Bread (normal, sliced, hamburger, doggy), refined, whole-grain, with seeds.                                          |
|                         | Breakfast cereals and flakes       | Puffed rice, oatmeal, flakes.                                                                                        |
|                         | Cakes and pastries                 | Donuts, muffins, gluten-free cupcake, croissants, profiteroles, ready-to-use mixes for pastries                      |
|                         | Cereal bars                        | Plain, with chocolate, nuts, (dry) fruits, polialcohols                                                              |
|                         | Cereal cakes and toasts            | Cakes (rice, wheat, corn, oat, spelt), wheat toasts.                                                                 |
|                         | Natural or toasted, pasta and rice | Amaranth, quinoa, oats, barley, rye, millet, wheat, corn, spelt. Refined and whole-grain pasta and rice (brown).     |
|                         | Other derivatives and processed    | Snacks, pizza base, doughs, nachos, wheat sticks, dehydrated soup, pancake mix, breadcrumbs.                         |
| <b>Dairy</b>            | Cheese                             | Fresh, cured or semi-cured manchego, melted, with spices; cow, sheep, goat.                                          |
|                         | Dairy desserts                     | Custard, flan, catalane cream, chocolate and other flavoured mousses, rice pudding                                   |
|                         | Derivatives                        | Butter, cream, cheese mousse, spreading creams with cheese.                                                          |
|                         | Fermented milk                     | Yogurts, other fermented milk                                                                                        |
|                         | Milk-dairy beverages               | Milk (liquid, powder, condensed or evaporated), milk shakes, milk with other ingredients                             |
| <b>Fats</b>             | --                                 | Lard, margarines                                                                                                     |
| <b>Fish and seafood</b> | Derivatives                        | Tuna and anchovie pate, surimi.                                                                                      |
|                         | Processed                          | Canned, smoked, marinated. Roe, liver. Tuna, sardines, prawns, mackerel, salmon, octopus, mussels and other seafood. |
|                         | Whole or chopped                   | Fresh, chilled or frozen with no added ingredients.                                                                  |
| <b>Fruits</b>           | Derivatives                        | Olives, olive pates, canned fruit, candied fruit, jams, fruit spreads, sweet quinces.                                |
|                         | Dry                                | Figs, dates, plums, raisins.                                                                                         |

**Table S1 (cont).** Description of food groups and subgroups

| <b>Food groups</b>             | <b>Food subgroups</b>           | <b>Foods included</b>                                                                                                         |
|--------------------------------|---------------------------------|-------------------------------------------------------------------------------------------------------------------------------|
| <b>Legumes</b>                 | Canned                          | Beans, chickpeas, lentils, peas, green beans, soy                                                                             |
|                                | Dry                             | Beans, chickpeas, lentils, peas, green beans, soy                                                                             |
|                                | Flour and pasta-like            | Chickpea, lentil, pea, carob and soy flour; pea, lentil and chickpea pasta.                                                   |
|                                | Other derivatives and processed | Fermented soy, soy desserts, chips, hummus                                                                                    |
| <b>Meat</b>                    | --                              | Cold meat, luncheon meat, pate.                                                                                               |
| <b>Non-alcoholic beverages</b> | Fruit beverages and soft drinks | Nectars, fruit drinks, musts, horchatas, soft drinks (cola, orange and lemon sodas), flavoured water with sweeteners, tonics. |
|                                | Juices                          | Apple, grape, tomato, peach, orange, pineapple, berries.                                                                      |
|                                | Other beverages                 | Non-alcoholic beers, vegetable beverages (soy, oat, rice, coconut, almond)                                                    |
| <b>Nuts and seeds</b>          | Natural or toasted              | Unprocessed or toasted nuts and seeds (pumpkin, poppies, sunflower, flax, chia, hemp)                                         |
|                                | Processed                       | Salted nuts                                                                                                                   |
| <b>Sauces and condiments</b>   | Condiments and vinegar          | Seasonings, vinegars.                                                                                                         |
|                                | Sauces                          | Ketchup, mayonnaises, other sauces.                                                                                           |
| <b>Sweets and chocolates</b>   | Chocolates                      | Chocolate bars, filled chocolates, chocolate powder, chocolate-coated cereal bars, ready-to-use mixes.                        |
|                                | Sweets                          | Chewing gums, caramels, wafers, honey, candies, syrups, sweet creams.                                                         |
| <b>Vegetables</b>              | Canned                          | Salads, sweet corn, all kind of vegetables.                                                                                   |
|                                | Other derivatives and processed | Creams and soups, pickled gherkins, gazpacho, tomato-based sauces, vegetable jams.                                            |
|                                | Tubers and derivatives          | Potato chips, processed potatoes.                                                                                             |

**Table S2.** Foods with NCs and number of NCs by subgroup

| Food groups/subgroups              | No foods | No foods with NCs | % Foods with NCs within the subgroup | No NCs | No NCs/food <sup>1</sup> |
|------------------------------------|----------|-------------------|--------------------------------------|--------|--------------------------|
| <b>Cereals</b>                     |          |                   |                                      |        |                          |
| Biscuits                           | 218      | 101               | 46.3                                 | 284    | 2.8                      |
| Bran, flour and germ               | 50       | 27                | 54.0                                 | 83     | 3.1                      |
| Bread (also sliced)                | 29       | 8                 | 27.6                                 | 8      | 1.0                      |
| Breakfast cereals and flakes       | 77       | 59                | 76.6                                 | 254    | 4.3                      |
| Cakes and pastries                 | 75       | 5                 | 6.7                                  | 14     | 2.8                      |
| Cereal bars                        | 26       | 17                | 65.4                                 | 36     | 2.1                      |
| Cereal cakes and toasts            | 54       | 19                | 35.2                                 | 22     | 1.2                      |
| Natural or toasted, pasta and rice | 163      | 52                | 31.9                                 | 233    | 4.5                      |
| Other derivatives and processed    | 104      | 41                | 39.4                                 | 124    | 3.0                      |
| <b>Dairy</b>                       |          |                   |                                      |        |                          |
| Cheese                             | 164      | 46                | 28                                   | 99     | 2.2                      |
| Dairy desserts                     | 32       | 2                 | 6.3                                  | 5      | 2.5                      |
| Derivatives                        | 63       | 14                | 22.2                                 | 23     | 1.6                      |
| Fermented milk                     | 121      | 42                | 34.7                                 | 68     | 1.6                      |
| Milk-dairy beverages               | 60       | 32                | 53.3                                 | 93     | 3.6                      |
| <b>Fish and seafood</b>            |          |                   |                                      |        |                          |
| Derivatives                        | 22       | 12                | 54.5                                 | 24     | 2.0                      |
| Processed                          | 234      | 74                | 31.6                                 | 178    | 2.4                      |
| Whole or chopped                   | 55       | 13                | 23.6                                 | 28     | 2.2                      |
| <b>Fruits</b>                      |          |                   |                                      |        |                          |
| Derivatives                        | 155      | 33                | 21.3                                 | 69     | 2.1                      |
| Dry                                | 17       | 9                 | 52.9                                 | 42     | 4.7                      |
| <b>Legumes</b>                     |          |                   |                                      |        |                          |
| Canned                             | 53       | 37                | 69.8                                 | 119    | 3.2                      |
| Dry                                | 123      | 32                | 26.0                                 | 173    | 5.4                      |
| Flour and pasta-like               | 15       | 15                | 100                                  | 55     | 3.7                      |
| Other derivatives and processed    | 63       | 54                | 85.7                                 | 319    | 5.9                      |
| <b>Non-alcoholic beverages</b>     |          |                   |                                      |        |                          |
| Fruit beverages and soft drinks    | 156      | 79                | 50.6                                 | 194    | 2.5                      |
| Juices                             | 36       | 10                | 27.8                                 | 21     | 2.1                      |
| Other beverages                    | 68       | 49                | 72.1                                 | 286    | 5.8                      |
| <b>Nuts and seeds</b>              |          |                   |                                      |        |                          |
| Natural or toasted                 | 45       | 30                | 66.7                                 | 258    | 8.6                      |
| Processed                          | 50       | 30                | 60.0                                 | 299    | 10                       |
| <b>Sauces and condiments</b>       |          |                   |                                      |        |                          |
| Condiments and vinegars            | 11       | 0                 | 0.0                                  | 0      | 0.0                      |
| Sauces                             | 84       | 14                | 16.7                                 | 19     | 1.4                      |
| <b>Sweets and chocolates</b>       |          |                   |                                      |        |                          |
| Chocolates                         | 231      | 33                | 14.3                                 | 60     | 1.8                      |
| Sweets                             | 39       | 6                 | 15.4                                 | 10     | 1.7                      |
| <b>Vegetables</b>                  |          |                   |                                      |        |                          |
| Canned                             | 81       | 46                | 56.8                                 | 123    | 2.7                      |
| Other derivatives and processed    | 103      | 19                | 18.4                                 | 27     | 1.4                      |
| Tubers and derivatives             | 45       | 11                | 24.4                                 | 29     | 2.6                      |

<sup>1</sup>Only considered foods with NCs

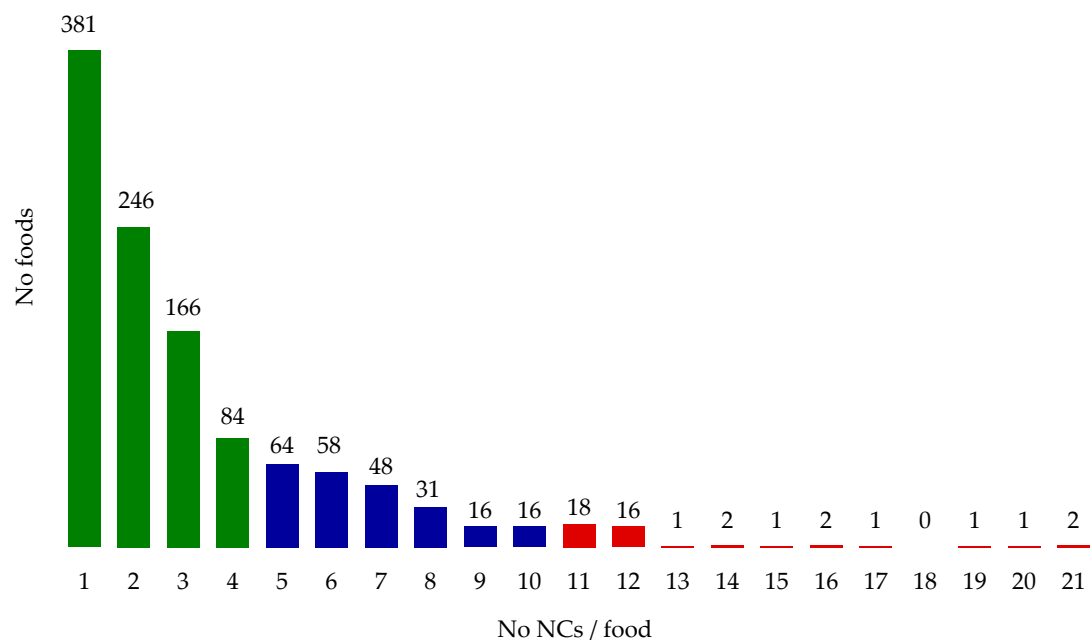

**Figure S1.** Distribution of foods according to the number of NCs

**Table S3.** List of all NCs authorized with total frequency, correct, incorrect and non-evaluable

| Specific NC                               | Total | Correct |       | Incorrect |       | Non-evaluable |      |
|-------------------------------------------|-------|---------|-------|-----------|-------|---------------|------|
|                                           | n     | n       | %     | n         | %     | n             | %    |
| Energy-free                               | 22    | 12      | 54.5  | 10        | 45.5  | 0             | 0    |
| Energy-reduced                            | 35    | 27      | 77.1  | 7         | 20    | 1             | 2.9  |
| Fat-free                                  | 98    | 89      | 90.8  | 9         | 9.2   | 0             | 0    |
| High calcium                              | 31    | 17      | 54.8  | 13        | 41.9  | 1             | 3.2  |
| High fibre                                | 214   | 186     | 86.9  | 24        | 11.2  | 4             | 1.9  |
| High iron                                 | 33    | 13      | 39.4  | 14        | 48.5  | 4             | 12.1 |
| High magnesium                            | 48    | 5       | 10.4  | 42        | 87.5  | 1             | 2.1  |
| High minerals (general)                   | 10    | 0       | 0     | 10        | 100   | 0             | 0    |
| High omega-3 fatty acids                  | 42    | 0       | 0     | 42        | 100   | 0             | 0    |
| High phosphorus                           | 46    | 4       | 8.7   | 42        | 91.3  | 0             | 0    |
| High polyunsaturated fat                  | 9     | 4       | 44.4  | 5         | 55.6  | 0             | 0    |
| High potassium                            | 8     | 4       | 50    | 4         | 50    | 0             | 0    |
| High protein                              | 146   | 79      | 54.1  | 58        | 39.7  | 9             | 6.2  |
| High selenium                             | 1     | 0       | 0     | 1         | 100   | 0             | 0    |
| High unsaturated fat                      | 46    | 22      | 47.8  | 21        | 45.7  | 3             | 6.5  |
| High vitamin A                            | 8     | 0       | 0     | 8         | 100   | 0             | 0    |
| High vitamin B1                           | 15    | 9       | 60    | 6         | 40    | 0             | 0    |
| High vitamin B12                          | 11    | 8       | 72.7  | 3         | 27.3  | 0             | 0    |
| High vitamin B2                           | 9     | 8       | 88.9  | 1         | 11.1  | 0             | 0    |
| High vitamin B3                           | 10    | 8       | 80    | 2         | 20    | 0             | 0    |
| High vitamin B6                           | 12    | 8       | 66.7  | 4         | 33.3  | 0             | 0    |
| High vitamin B9                           | 12    | 9       | 75    | 3         | 25    | 0             | 0    |
| High vitamin C                            | 16    | 7       | 43.75 | 9         | 56.25 | 0             | 0    |
| High vitamin D                            | 6     | 4       | 66.7  | 2         | 33.3  | 0             | 0    |
| High vitamin E                            | 16    | 9       | 56.3  | 7         | 43.8  | 0             | 0    |
| High vitamin K                            | 2     | 0       | 0     | 2         | 100   | 0             | 0    |
| High vitamins (general)                   | 12    | 0       | 0     | 12        | 100   | 0             | 0    |
| High vitamins B                           | 7     | 0       | 0     | 7         | 100   | 0             | 0    |
| High zinc                                 | 2     | 0       | 0     | 2         | 100   | 0             | 0    |
| Increased fibre                           | 6     | 2       | 33.3  | 1         | 16.7  | 3             | 50   |
| Increased minerals (general and specific) | 9     | 0       | 0     | 7         | 77.8  | 2             | 22.2 |
| Increased omega-3 fatty acids             | 5     | 1       | 20    | 4         | 80    | 0             | 0    |
| Increased protein                         | 6     | 2       | 33.3  | 4         | 66.7  | 0             | 0    |
| Increased vitamins (general and specific) | 2     | 0       | 0     | 2         | 100   | 0             | 0    |
| Light                                     | 87    | 32      | 36.8  | 54        | 62.1  | 1             | 1.1  |
| Low energy                                | 33    | 17      | 51.5  | 16        | 48.5  | 0             | 0    |
| Low fat                                   | 174   | 145     | 93.3  | 29        | 16.7  | 0             | 0    |
| Low saturated fat                         | 164   | 0       | 0     | 164       | 100   | 0             | 0    |
| Low sodium/salt                           | 39    | 31      | 79.5  | 8         | 20.5  | 0             | 0    |
| Low sugars                                | 35    | 32      | 91.4  | 3         | 8.6   | 0             | 0    |
| Naturally / Natural                       | 84    | 45      | 53.6  | 36        | 42.9  | 3             | 3.6  |
| No added sodium/salt                      | 21    | 15      | 71.4  | 1         | 4.8   | 5             | 23.8 |
| Reduced (others)                          | 4     | 0       | 0     | 4         | 100   | 0             | 0    |
| Reduced fat                               | 42    | 31      | 73.8  | 11        | 26.2  | 0             | 0    |
| Reduced fibre                             | 1     | 0       | 0     | 1         | 100   | 0             | 0    |
| Reduced protein                           | 1     | 0       | 0     | 1         | 100   | 0             | 0    |
| Reduced saturated fat                     | 31    | 0       | 0     | 31        | 100   | 0             | 0    |

**Table S3 (cont).** List of all NCs authorized with total frequency, correct, incorrect and non-evaluable

| Specific NC                   | Total | Correct |      | Incorrect |      | Non-evaluable |      |
|-------------------------------|-------|---------|------|-----------|------|---------------|------|
|                               | n     | n       | %    | n         | %    | n             | %    |
| Reduced sodium/salt           | 69    | 34      | 49.3 | 32        | 46.4 | 3             | 4.3  |
| Reduced sugars                | 9     | 3       | 33.3 | 6         | 66.7 | 0             | 0    |
| Saturated fat-free            | 18    | 0       | 0    | 18        | 100  | 0             | 0    |
| Sodium/salt-free              | 72    | 22      | 30.6 | 49        | 68.1 | 1             | 1.4  |
| Source of (number) vitamins   | 49    | 0       | 0    | 49        | 100  | 0             | 0    |
| Source of boron               | 1     | 0       | 0    | 1         | 100  | 0             | 0    |
| Source of calcium             | 124   | 107     | 86.3 | 16        | 12.9 | 1             | 0.8  |
| Source of copper              | 3     | 0       | 0    | 3         | 100  | 0             | 0    |
| Source of fibre               | 233   | 211     | 90.6 | 20        | 8.6  | 2             | 0.9  |
| Source of iodine              | 1     | 0       | 0    | 1         | 100  | 0             | 0    |
| Source of iron                | 78    | 24      | 30.8 | 53        | 67.9 | 1             | 1.3  |
| Source of magnesium           | 23    | 11      | 47.8 | 11        | 47.8 | 1             | 4.3  |
| Source of manganese           | 1     | 0       | 0    | 1         | 100  | 0             | 0    |
| Source of minerals (general)  | 7     | 0       | 0    | 7         | 100  | 0             | 0    |
| Source of omega-3 fatty acids | 63    | 14      | 22.2 | 49        | 77.8 | 0             | 0    |
| Source of phosphorus          | 31    | 5       | 16.1 | 26        | 83.1 | 0             | 0    |
| Source of potassium           | 14    | 2       | 14.3 | 12        | 85.7 | 0             | 0    |
| Source of protein             | 128   | 122     | 95.3 | 5         | 3.9  | 1             | 0.8  |
| Source of selenium            | 5     | 2       | 40   | 3         | 60   | 0             | 0    |
| Source of vitamin A           | 41    | 23      | 56.1 | 18        | 43.9 | 0             | 0    |
| Source of vitamin B1          | 17    | 12      | 70.6 | 5         | 29.4 | 0             | 0    |
| Source of vitamin B12         | 47    | 40      | 85.1 | 7         | 14.9 | 0             | 0    |
| Source of vitamin B2          | 30    | 25      | 83.3 | 5         | 16.7 | 0             | 0    |
| Source of vitamin B3          | 18    | 14      | 77.8 | 4         | 22.2 | 0             | 0    |
| Source of vitamin B5          | 27    | 2       | 7.4  | 25        | 92.6 | 0             | 0    |
| Source of vitamin B6          | 59    | 33      | 55.9 | 26        | 44.1 | 0             | 0    |
| Source of vitamin B8          | 1     | 1       | 100  | 0         | 0    | 0             | 0    |
| Source of vitamin B9          | 58    | 28      | 48.3 | 30        | 51.7 | 0             | 0    |
| Source of vitamin C           | 31    | 17      | 54.8 | 14        | 45.2 | 0             | 0    |
| Source of vitamin D           | 65    | 59      | 90.8 | 6         | 9.2  | 0             | 0    |
| Source of vitamin E           | 65    | 26      | 40   | 38        | 60   | 0             | 0    |
| Source of vitamin K           | 2     | 0       | 0    | 2         | 100  | 0             | 0    |
| Source of vitamins (general)  | 16    | 6       | 37.5 | 10        | 62.5 | 0             | 0    |
| Source of vitamins B          | 5     | 0       | 0    | 5         | 100  | 0             | 0    |
| Source of zinc                | 12    | 8       | 66.7 | 4         | 33.3 | 0             | 0    |
| Sugars-free                   | 207   | 82      | 39.6 | 122       | 58.9 | 3             | 1.4  |
| Very low sodium/salt          | 42    | 42      | 100  | 0         | 0    | 0             | 0    |
| With no added sugars          | 141   | 30      | 21.3 | 96        | 68.1 | 15            | 10.6 |

**Table S4.** Non-authorised claims used in foods

| Type                      | No         |
|---------------------------|------------|
| <b>General</b>            | <b>227</b> |
| Content of nutrients      | 12         |
| Nutritive                 | 70         |
| Others                    | 46         |
| <b>Specific nutrients</b> | <b>127</b> |
| Aminoacids                | 6          |
| Carbohydrates             | 41         |
| Cholesterol               | 6          |
| Energy                    | 10         |
| Fiber                     | 2          |
| Lipids                    | 111        |
| Other components          | 13         |
| Others                    | 3          |
| Proteins                  | 32         |
| Vitamins and minerals     | 3          |
